# Supplementary material for: Reference-free time-based localization for an asynchronous target
Source: Springer Nature journal article supplement (doi:10.1186/1687-6180-2012-19), 2012-01-26
Supplement: 13634_2011_181_MOESM1_ESM.pdf [file 13634_2011_181_MOESM1_ESM.pdf]

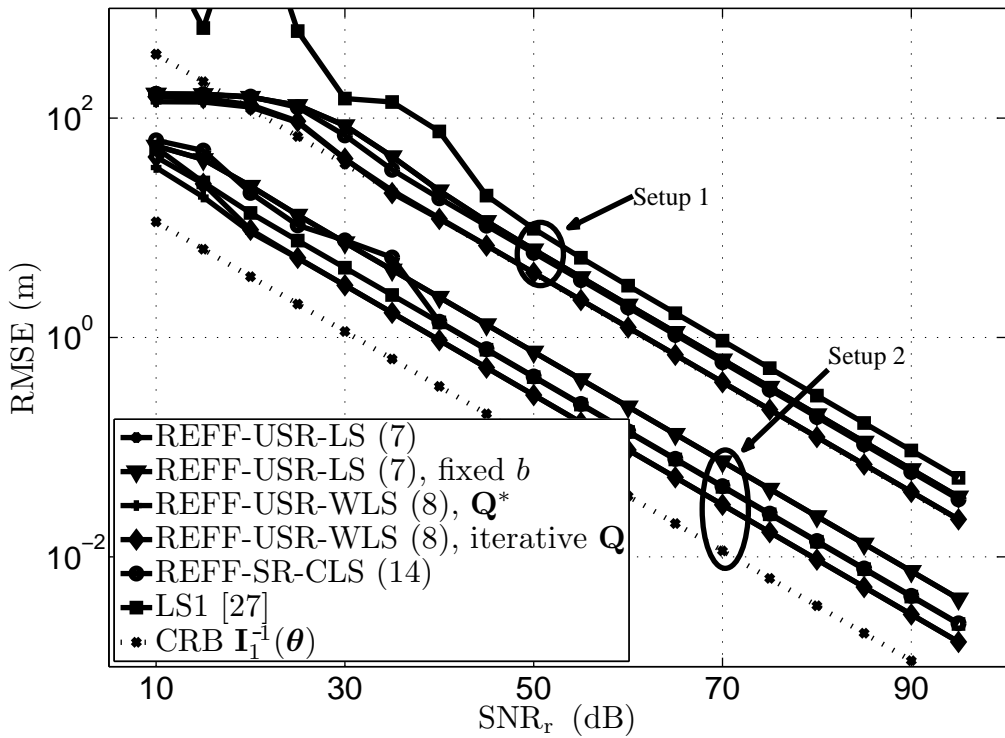

(a)

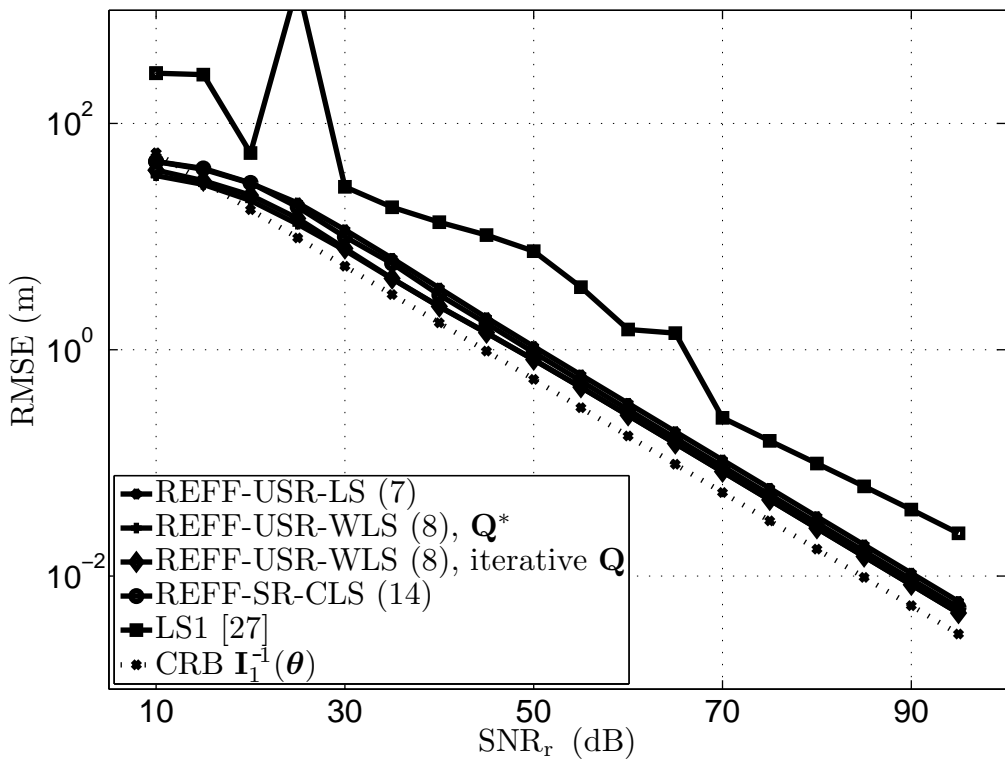

(b)
